# Supplementary material for: Coordinate Regulation of G Protein Signaling via Dynamic Interactions of Receptor and GAP
Source: PLoS Comput Biol. 2008 Aug 15;4(8):e1000148. doi: 10.1371/journal.pcbi.1000148 (PMC2518520; doi:10.1371/journal.pcbi.1000148)
Supplement: Table S2 — Values of parameters. (0.07 MB DOC) [file pcbi.1000148.s005.doc]

Supporting Table 2. Values of parameters

| Reaction | Rate Constant |  down |  up | Reaction | Rate Constant |  down |  up |
| --- | --- | --- | --- | --- | --- | --- | --- |
| a1,1 | 2.5 x 10 4 | 2.4 x 10 4 | 1.9 x 10 6 | a1,2 | 6.7 x 10 -2 | 6.6 x 10 -2 | 3.1 |
| a2,1 | 2.5 x 10 5 | 2.4 x 10 5 | 9.5 x 10 6 | a2,2 | 2.6 x 10 -2 | 2.5 x 10 -2 | 1.4 |
| a3,1 | 7.7 x 10 3 | 7.5 x 10 3 | 2.7 x 10 5 | a3,2 | 2.8 x 10 -2 | 2.8 x 10 -2 | 4.5 |
| a4,1 | 2.8 x 10 3 | 2.6 x 10 3 | 5.7 x 10 4 | a4,2 | 5.0 x 10 -3 | 4.7 x 10 -3 | 8.1 x 10 -2 |
| a5,1 | 3.4 x 10 4 | 3.3 x 10 4 | 1.1 x 10 6 | a5,2 | 8.7 x 10 -2 | 8.3 x 10 -2 | 2.1 |
| a6,1 | 5.4 x 10 3 | 5.3 x 10 3 | 2.9 x 10 5 | a6,2 | 2.4 | 2.3 | 4.1 x 10 1 |
|  |  |  |  |  |  |  |  |
| r1,1 | 1.4 x 10 7 | 1.4 x 10 7 | 5.2 x 10 8 | r1,2 | 6.8 x 10 -4 | 6.6 x 10 -4 | 2.7 x 10 -2 |
| r2,1 | 4.3 x 10 6 | 4.0 x 10 6 | 6.7 x 10 7 | r2,2 | 5.0 x 10 -2 | 4.7 x 10 -2 | 7.7 x 10 -1 |
| r3,1 | 1.3 x 10 7 | 1.2 x 10 7 | 6.2 x 10 8 | r3,2 | 1.9 x 10 -3 | 1.9 x 10 -3 | 1.1 x 10 -1 |
| r4,1 | 8.5 x 10 6 | 8.0 x 10 6 | 1.4 x 10 8 | r4,2 | 2.7 x 10 -4 | 2.6 x 10 -4 | 7.6 x 10 -3 |
| r5,1 | 4.0 x 10 5 | 3.7 x 10 5 | 7.0 x 10 6 | r5,2 | 1.1 x 10 -1 | 1.1 x 10 -1 | 3.4 |
| r6,1 | 8.4 x 10 5 | 8.1 x 10 5 | 2.8 x 10 7 | r6,2 | 1.6 x 10 -2 | 1.5 x 10 -2 | 1.0 |
|  |  |  |  |  |  |  |  |
| t1,1 | 4.9 x 10 2 | 2.7 x 10 2 | 6.1 x 10 2 | t1,2 | 2.2 x 10 -8 | 1.8 x 10 -8 | 1.1 x 10 -7 |
| t2,1 | 3.8 x 10 2 | 2.0 x 10 2 | 4.1 x 10 2 | t2,2 | 6.4 x 10 -10 | 5.8 x 10 -10 | 6.3 x 10 -9 |
| t3,1 | 1.7 x 10 6 | 9.6 x 10 5 | 2.2 x 10 6 | t3,2 | 1.9 x 10 -2 | 1.7 x 10 -2 | 1.8 x 10 -1 |
| t4,1 | 2.1 x 10 6 | 3.0 x 10 5 | 3.5 x 10 5 | t4,2 | 3.1 x 10 -2 | 2.9 x 10 -2 | 3.6 x 10 -1 |
|  |  |  |  |  |  |  |  |
| p1,1 | 1.8 x 10 -2 | 1.7 x 10 -2 | 2.1 x 10 -1 | p1,2 | 5.1 x 10 -6 | 4.1 x 10 -6 | 2.2 x 10 -5 |
| p2,1 | 1.8 x 10 1 | 1.6 x 10 1 | 2.4 x 10 2 | p2,2 | 1.7 x 10 -1 | 1.6 x 10 -1 | 2.7 |
| p3,1 | 6.2 x 10 -3 | 5.8 x 10 -3 | 9.1 x 10 -2 | p3,2 | 2.2 x 10 -8 | 2.1 x 10 -8 | 3.1 x 10 -7 |
| p4,1 | 1.5 x 10 1 | 1.2 x 10 1 | 6.6 x 10 1 | p4,2 | 9.5 x 10 -3 | 9.0 x 10 -3 | 1.7 x 10 -1 |
|  |  |  |  |  |  |  |  |
| d1,1 | 3.6 x 10 3 | 1.8 x 10 3 | 3.7 x 10 3 | d1,2 | 1.5 x 10 -5 | 1.1 x 10 -5 | 4.4 x 10 -5 |
| d2,1 | 6.8 x 10 3 | 3.0 x 10 3 | 5.5 x 10 3 | d2,2 | 3.7 x 10 -5 | 2.7 x 10 -5 | 9.9 x 10 -5 |
| d3,1 | 2.1 x 10 7 | 1.8 x 10 7 | 1.0 x 10 8 | d3,2 | 2.8 x 10 -1 | 2.2 x 10 -1 | 1.1 |
| d4,1 | 1.5 x 10 6 | 6.0 x 10 5 | 1.0 x 10 6 | d4,2 | 4.7 | 1.8 | 2.9 |

Values of the rate constants that describe the GTPase reaction model (Fig. 1) were determined by fitting to steady-state data as described in Experimental Procedures. Values are log averages of 41 fitting runs (Fig. 3). Because log averages were used, equivalent to averaging G‡,

asymmetric values of s.d. are shown as up or down. Units are s-1 or M-1**.**s-1.
